# Supplementary material for: Hgc1 Independence of Biofilm Hyphae in Candida albicans
Source: PubMed Central journal article supplement (PMC10128054; doi:10.1128/mbio.03498-22), 2023-02-13
Supplement: mbio.03498-22-s0002.pdf [file mbio.03498-22-s0002.pdf]

**Supplementary Figure S2**

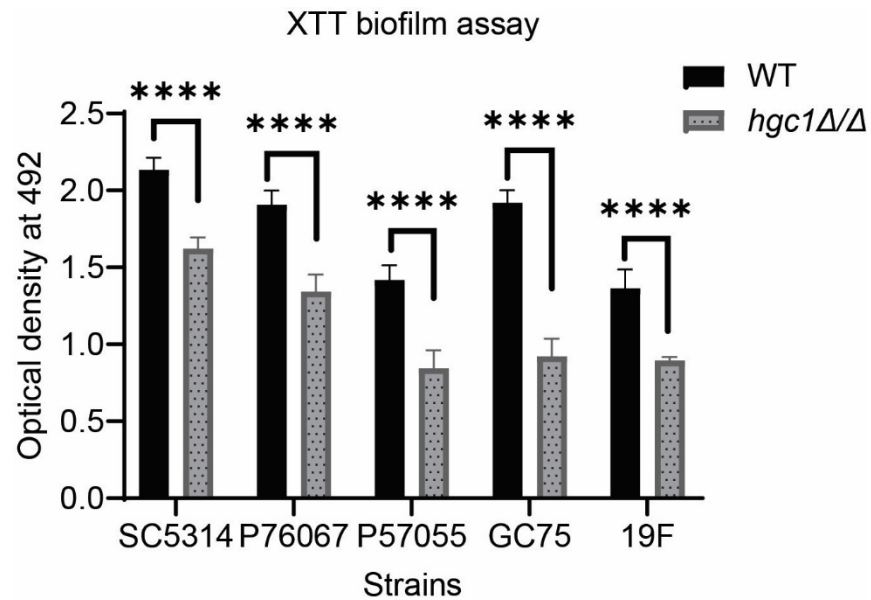

**Fig. S2: XTT reduction assay.** The effect of *hgc1*Δ/Δ mutation on the biofilm growth across five clinical isolates was measured in RPMI+ 10% serum using XTT assay. Error bars indicate standard deviations from 3 biological replicates assayed. Data were analyzed using Sidak's multicomparison test. (\*\*\*\*,  $p < 0.0001$ ).
