# Supplementary material for: Hgc1 Independence of Biofilm Hyphae in Candida albicans
Source: PubMed Central journal article supplement (PMC10128054; doi:10.1128/mbio.03498-22), 2023-02-13
Supplement: mbio.03498-22-s0003.pdf [file mbio.03498-22-s0003.pdf]

**Supplementary Figure S3**

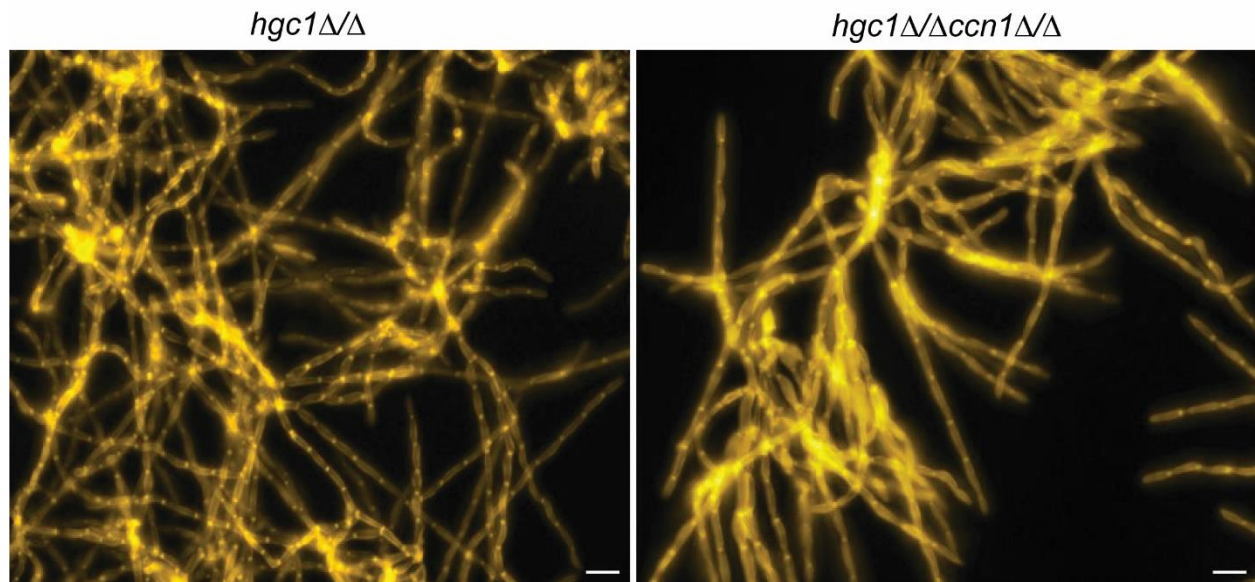

**Fig. S3: Hyphal growth during biofilm formation in SC5314 *hgc1ΔΔ* and *hgc1ΔΔccn1ΔΔ* mutants.** Apical view projections from the biofilms of the indicated strains were obtained using maximum intensity Z-projection of ~20 planes at 0.45  $\mu\text{m}$  step-size. Images were generated with a Keyence BZ-X800E fluorescence microscope. White scale bars in each panel are 100  $\mu\text{m}$  in length.
