# Supplementary material for: Hgc1 Independence of Biofilm Hyphae in Candida albicans
Source: PubMed Central journal article supplement (PMC10128054; doi:10.1128/mbio.03498-22), 2023-02-13
Supplement: mbio.03498-22-s0005.pdf [file mbio.03498-22-s0005.pdf]

Supplementary Figure S5

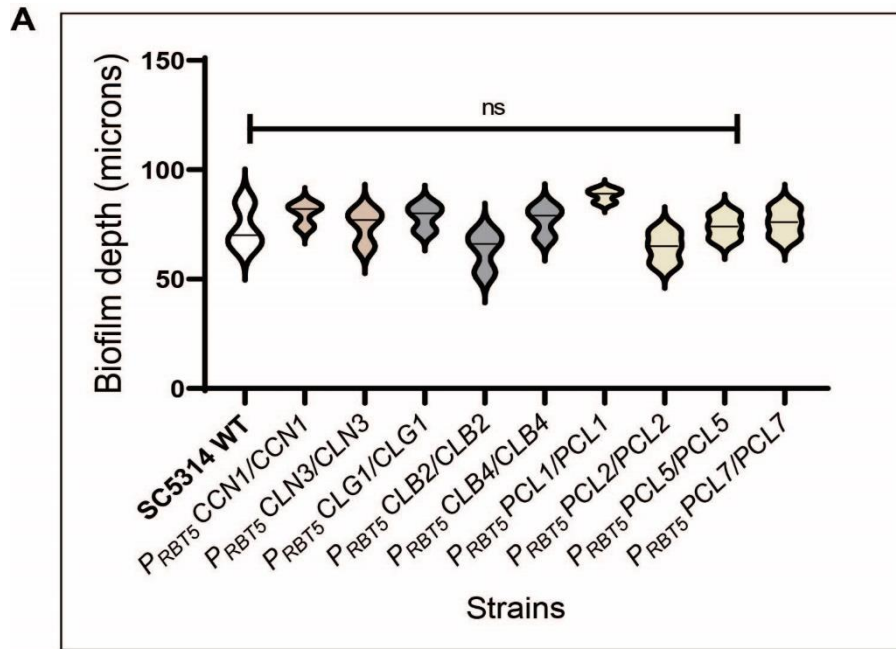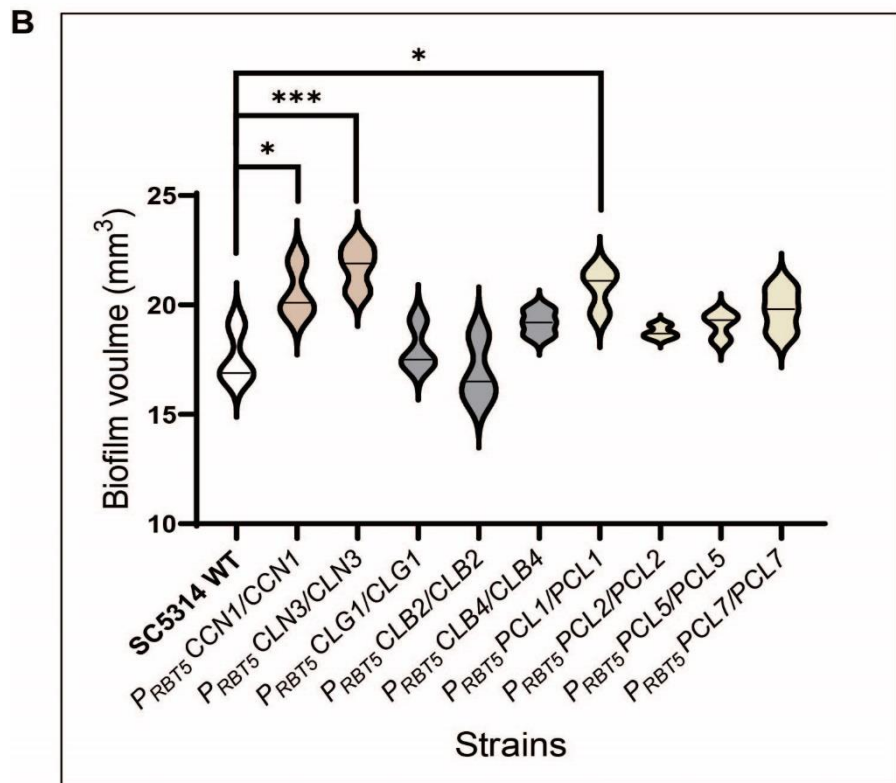

**Fig. S5: Biofilm depth and volume of SC5314 wild type strains overexpressing cyclin genes.** Biofilm depth (in micrometers) and volume (in cubic millimeters) of all the mentioned strains grown in RPMI medium at 37°C for 24 hours were measured with Image J. **(A) and (B)** Violin plots showing the biofilm depth (in microns) and volume (in mm<sup>3</sup>) distributions of the indicated strains respectively. The significant differences were calculated between the pair of means using Sidak's multicomparison test: ns,  $p > 0.05$ ; \*,  $p < 0.05$ ; \*\*\*,  $p < 0.001$ .
