# Supplementary material for: Hgc1 Independence of Biofilm Hyphae in Candida albicans
Source: PubMed Central journal article supplement (PMC10128054; doi:10.1128/mbio.03498-22), 2023-02-13
Supplement: mbio.03498-22-s0006.pdf [file mbio.03498-22-s0006.pdf]

**Supplementary Figure S6**

| Strains                           | Biofilm depth           |                                                  | Biofilm volume          |                                                  |
|-----------------------------------|-------------------------|--------------------------------------------------|-------------------------|--------------------------------------------------|
|                                   | WT<br>( $\mu\text{m}$ ) | <i>hgc1</i> $\Delta/\Delta$<br>( $\mu\text{m}$ ) | WT<br>( $\text{mm}^3$ ) | <i>hgc1</i> $\Delta/\Delta$<br>( $\text{mm}^3$ ) |
| SC5314                            | 73                      | 43                                               | 18                      | 12                                               |
| <i>P<sub>RBT5</sub> CCN1/CCN1</i> | 80                      | 63                                               | 21                      | 15                                               |
| <i>P<sub>RBT5</sub> CLN3/CLN3</i> | 74                      | 68                                               | 22                      | 15                                               |
| <i>P<sub>RBT5</sub> CLB2/CLB2</i> | 63                      | 35                                               | 17                      | 13                                               |
| <i>P<sub>RBT5</sub> CLB4/CLB4</i> | 77                      | 41                                               | 19                      | 13                                               |
| <i>P<sub>RBT5</sub> CLG1/CLG1</i> | 79                      | 41                                               | 18                      | 12                                               |
| <i>P<sub>RBT5</sub> PCL1/PCL1</i> | 88                      | 46                                               | 21                      | 12                                               |
| <i>P<sub>RBT5</sub> PCL2/PCL2</i> | 65                      | 45                                               | 19                      | 12                                               |
| <i>P<sub>RBT5</sub> PCL5/PCL5</i> | 74                      | 45                                               | 19                      | 12                                               |
| <i>P<sub>RBT5</sub> PCL7/PCL7</i> | 76                      | 48                                               | 20                      | 13                                               |

**Fig. S6: Biofilm depth and volume of strains overexpressing different cyclin genes.** Biofilm depth (in micrometers) and volume (in cubic millimeters) of all the mentioned strains grown in RPMI medium at 37°C for 24 hours were measured with Image J. The values represent the means of the triplicate biofilms of each strain background.
