# Supplementary material for: Hgc1 Independence of Biofilm Hyphae in Candida albicans
Source: PubMed Central journal article supplement (PMC10128054; doi:10.1128/mbio.03498-22), 2023-02-13
Supplement: mbio.03498-22-s0007.pdf [file mbio.03498-22-s0007.pdf]

**Supplementary Table S1**

| Strain no. | Strain                                           | Species           | Genotype/Parent                                                                             |
|------------|--------------------------------------------------|-------------------|---------------------------------------------------------------------------------------------|
| ASM1       | SC5314                                           | <i>C.albicans</i> | Wild type clinical isolate                                                                  |
| ASM5       | P76067                                           | <i>C.albicans</i> | Wild type clinical isolate                                                                  |
| ASM3       | P57055                                           | <i>C.albicans</i> | Wild type clinical isolate                                                                  |
| ASM7       | GC75                                             | <i>C.albicans</i> | Wild type clinical isolate                                                                  |
| ASM9       | 19F                                              | <i>C.albicans</i> | Wild type clinical isolate                                                                  |
| ASM11      | SC5314 His-                                      | <i>C.albicans</i> | <i>his1Δ::rNAT1r/his1Δ::rNAT1r</i>                                                          |
| ASM15      | P76067 His-                                      | <i>C.albicans</i> | <i>his1Δ::rNAT1r/his1Δ::rNAT1r</i>                                                          |
| ASM13      | P57055 His-                                      | <i>C.albicans</i> | <i>his1Δ::rNAT1r/his1Δ::rNAT1r</i>                                                          |
| ASM17      | GC75 His-                                        | <i>C.albicans</i> | <i>his1Δ::rNAT1r/his1Δ::rNAT1r</i>                                                          |
| ASM19      | 19F His-                                         | <i>C.albicans</i> | <i>his1Δ::rNAT1r/his1Δ::rNAT1r</i>                                                          |
| ASM35      | SC5314 <i>hgc1Δ/Δ</i>                            | <i>C.albicans</i> | <i>hgc1Δ::r1HIS1r1/hgc1Δ::r1HIS1r1 his1Δ::r3/his1Δ::r3</i>                                  |
| ASM27      | P76067 <i>hgc1Δ/Δ</i>                            | <i>C.albicans</i> | <i>hgc1Δ::r1HIS1r1/hgc1Δ::r1HIS1r1 his1Δ::r3/his1Δ::r3</i>                                  |
| ASM33      | P57055 <i>hgc1Δ/Δ</i>                            | <i>C.albicans</i> | <i>hgc1Δ::r1HIS1r1/hgc1Δ::r1HIS1r1 his1Δ::r3/his1Δ::r3</i>                                  |
| ASM120     | GC75 <i>hgc1Δ/Δ</i>                              | <i>C.albicans</i> | <i>hgc1Δ::r1HIS1r1/hgc1Δ::r1HIS1r1 his1Δ::r3/his1Δ::r3</i>                                  |
| ASM118     | 19F <i>hgc1Δ/Δ</i>                               | <i>C.albicans</i> | <i>hgc1Δ::r1HIS1r1/hgc1Δ::r1HIS1r1 his1Δ::r3/his1Δ::r3</i>                                  |
| ASM334     | SC5314RC                                         | <i>C.albicans</i> | <i>hgc1Δ::HGCI-SC5314 NAT1/hgc1Δ::HGCI-SC5314-NAT1 his1Δ::r3/his1Δ::r3</i>                  |
| ASM389     | P76067RC                                         | <i>C.albicans</i> | <i>hgc1Δ::HGCI-SC5314-NAT1/hgc1Δ::HGCI-SC5314-NAT1 his1Δ::r3/his1Δ::r3</i>                  |
| ASM315     | P57055RC                                         | <i>C.albicans</i> | <i>hgc1Δ::HGCI-SC5314-NAT1/hgc1Δ::HGCI-SC5314-NAT1 his1Δ::r3/his1Δ::r3</i>                  |
| ASM397     | GC75RC                                           | <i>C.albicans</i> | <i>hgc1Δ::HGCI-SC5314-NAT1/hgc1Δ::HGCI-SC5314-NAT1 his1Δ::r3/his1Δ::r3</i>                  |
| ASM393     | 19FRC                                            | <i>C.albicans</i> | <i>hgc1Δ::HGCI-SC5314-NAT1/hgc1Δ::HGCI-SC5314-NAT1 his1Δ::r3/his1Δ::r3</i>                  |
| ASM524     | SC5314 <i>P<sub>RBT5</sub>-CCNI/CCNI</i>         | <i>C.albicans</i> | <i>CCNI::P<sub>RBT5</sub>-CCNI/CCNI</i>                                                     |
| ASM527     | SC5314 <i>hgc1Δ/Δ P<sub>RBT5</sub>-CCNI/CCNI</i> | <i>C.albicans</i> | <i>hgc1Δ::r1HIS1r1/hgc1Δ::r1HIS1r1 CCNI::P<sub>RBT5</sub>-CCNI/CCNI his1Δ::r3/his1Δ::r3</i> |
| ASM530     | SC5314 <i>P<sub>RBT5</sub>-CLN3/CLN3</i>         | <i>C.albicans</i> | <i>CLN3::P<sub>RBT5</sub>-CLN3/CLN3</i>                                                     |
| ASM533     | SC5314 <i>hgc1Δ/Δ P<sub>RBT5</sub>-CLN3/CLN3</i> | <i>C.albicans</i> | <i>hgc1Δ::r1HIS1r1/hgc1Δ::r1HIS1r1 CLN3::P<sub>RBT5</sub>-CLN3/CLN3 his1Δ::r3/his1Δ::r3</i> |
| ASM545     | SC5314 <i>P<sub>RBT5</sub>-CLG1/CLG1</i>         | <i>C.albicans</i> | <i>CLG1::P<sub>RBT5</sub>-CLG1/CLG1</i>                                                     |

|        |                                                            |                   |                                                                                             |
|--------|------------------------------------------------------------|-------------------|---------------------------------------------------------------------------------------------|
| ASM548 | SC5314 <i>hgc1Δ/Δ</i><br><i>P<sub>RBT5</sub>-CLG1/CLG1</i> | <i>C.albicans</i> | <i>hgc1Δ::r1HIS1r1/hgc1Δ::r1HIS1r1 CLG1::P<sub>RBT5</sub>-CLG1/CLG1 his1Δ::r3/his1Δ::r3</i> |
| ASM595 | SC5314 <i>P<sub>RBT5</sub>-CLB2/CLB2</i>                   | <i>C.albicans</i> | <i>CLB2::P<sub>RBT5</sub>-CLB2/CLB2</i>                                                     |
| ASM597 | SC5314 <i>hgc1Δ/Δ</i><br><i>P<sub>RBT5</sub>-CLB2/CLB2</i> | <i>C.albicans</i> | <i>hgc1Δ::r1HIS1r1/hgc1Δ::r1HIS1r1 CLB2::P<sub>RBT5</sub>-CLB2/CLB2 his1Δ::r3/his1Δ::r3</i> |
| ASM553 | SC5314 <i>P<sub>RBT5</sub>-CLB4/CLB4</i>                   | <i>C.albicans</i> | <i>CLB4::P<sub>RBT5</sub>-CLB4/CLB4</i>                                                     |
| ASM555 | SC5314 <i>hgc1Δ/Δ</i><br><i>P<sub>RBT5</sub>-CLB4/CLB4</i> | <i>C.albicans</i> | <i>hgc1Δ::r1HIS1r1/hgc1Δ::r1HIS1r1 CLB4::P<sub>RBT5</sub>-CLB4/CLB4 his1Δ::r3/his1Δ::r3</i> |
| ASM570 | SC5314 <i>P<sub>RBT5</sub>-PCL1/PCL1</i>                   | <i>C.albicans</i> | <i>PCL1::P<sub>RBT5</sub>-PCL1/PCL1</i>                                                     |
| ASM574 | SC5314 <i>hgc1Δ/Δ</i><br><i>P<sub>RBT5</sub>-PCL1/PCL1</i> | <i>C.albicans</i> | <i>hgc1Δ::r1HIS1r1/hgc1Δ::r1HIS1r1 PCL1::P<sub>RBT5</sub>-PCL1/PCL1 his1Δ::r3/his1Δ::r3</i> |
| ASM577 | SC5314 <i>P<sub>RBT5</sub>-PCL2/PCL2</i>                   | <i>C.albicans</i> | <i>PCL2::P<sub>RBT5</sub>-PCL2/PCL2</i>                                                     |
| ASM581 | SC5314 <i>hgc1Δ/Δ</i><br><i>P<sub>RBT5</sub>-PCL2/PCL2</i> | <i>C.albicans</i> | <i>hgc1Δ::r1HIS1r1/hgc1Δ::r1HIS1r1 PCL2::P<sub>RBT5</sub>-PCL2/PCL2 his1Δ::r3/his1Δ::r3</i> |
| ASM560 | SC5314 <i>P<sub>RBT5</sub>-PCL5/PCL5</i>                   | <i>C.albicans</i> | <i>PCL5::P<sub>RBT5</sub>-PCL5/PCL5</i>                                                     |
| ASM565 | SC5314 <i>hgc1Δ/Δ</i><br><i>P<sub>RBT5</sub>-PCL5/PCL5</i> | <i>C.albicans</i> | <i>hgc1Δ::r1HIS1r1/hgc1Δ::r1HIS1r1 PCL5::P<sub>RBT5</sub>-PCL5/PCL5 his1Δ::r3/his1Δ::r3</i> |
| ASM586 | SC5314 <i>P<sub>RBT5</sub>-PCL7/PCL7</i>                   | <i>C.albicans</i> | <i>PCL7::P<sub>RBT5</sub>-PCL7/PCL7</i>                                                     |
| ASM591 | SC5314 <i>hgc1Δ/Δ</i><br><i>P<sub>RBT5</sub>-PCL7/PCL7</i> | <i>C.albicans</i> | <i>hgc1Δ::r1HIS1r1/hgc1Δ::r1HIS1r1 PCL7::P<sub>RBT5</sub>-PCL7/PCL7 his1Δ::r3/his1Δ::r3</i> |
| ASM647 | SC5314 <i>ccn1Δ/Δ</i>                                      | <i>C.albicans</i> | <i>ccn1Δ::NAT1/ccn1Δ::NAT1</i>                                                              |
| ASM650 | SC5314 <i>hgc1Δ/Δ</i><br><i>ccn1Δ/Δ</i>                    | <i>C.albicans</i> | <i>ccn1Δ::NAT1/ccn1Δ::NAT1<br/>hgc1Δ::r1HIS1r1/hgc1Δ::r1HIS1r1his1Δ::r3/his1Δ::r3</i>       |

**Supplementary Table S1: *Candida albicans* strains used in this study**
