# Supplementary material for: Hgc1 Independence of Biofilm Hyphae in Candida albicans
Source: PubMed Central journal article supplement (PMC10128054; doi:10.1128/mbio.03498-22), 2023-02-13
Supplement: mbio.03498-22-s0008.pdf [file mbio.03498-22-s0008.pdf]

**Supplementary Table S2**

| Plasmid name      | Description                                                     | Marker | Reference                  |
|-------------------|-----------------------------------------------------------------|--------|----------------------------|
| pNAT              | <i>NAT1</i> marker                                              | ampR   | Min <i>et al.</i> , 2016   |
| pV1093            | CaCas9/sgRNA expression vector                                  | ampR   | Vyas <i>et al.</i> , 2015  |
| pMH01             | pRS424 carrying <i>C.d.HIS1</i> from pSN52 at KpnI site         | ampR   | Huang and Mitchell, 2017   |
| pMH02             | pRS424 carrying <i>C.d.HIS1</i> from pSN52 at SapI site         | ampR   | Huang and Mitchell, 2017   |
| pGEM- <i>HGCI</i> | pGEM-2T                                                         | ampR   | This study                 |
| pTH10             | $P_{RBT5}$ cassette                                             | ampR   | Mao <i>et al.</i> , 2022   |
| pMH05             | YE <sub>p</sub> 24 carrying <i>NAT1</i> from pNAT at BamHI site | ampR   | Huang <i>et al.</i> , 2019 |
| pMH06             | YE <sub>p</sub> 24 carrying <i>NAT1</i> from pNAT at XmaI site  | ampR   | Huang <i>et al.</i> , 2019 |

**Supplementary Table S2: Plasmids used in this study**
