# Supplementary material for: Hgc1 Independence of Biofilm Hyphae in Candida albicans
Source: PubMed Central journal article supplement (PMC10128054; doi:10.1128/mbio.03498-22), 2023-02-13
Supplement: mbio.03498-22-s0009.pdf [file mbio.03498-22-s0009.pdf]

**Supplementary Table S3**

| <b>Primer name</b>               | <b>Sequence</b>                                                                                                      |
|----------------------------------|----------------------------------------------------------------------------------------------------------------------|
| <b>HGC1 del<br/>rHIS1rSapI/F</b> | <b>ATCAAAGCATCAAACCAATACCCAACACTTTAATATCTAGGGTTT<br/>CCATTCACATATACACATATAAACATATATTAATACTCGAGGTCG<br/>ACGGTATCG</b> |
| <b>HGC1 del<br/>rHIS1rKpnI/R</b> | <b>AAAACATCATTAATAATTTTCATATCATAATAACAACATCTTTCTCC<br/>ATTCTCCATTCTCTACTTTATCTTTCTCTCTTTCTCCAATACGCAA<br/>ACCGCC</b> |
| <b>HIS1 CRIME/F</b>              | <b>GCGCAAGAAGCCTCAACT</b>                                                                                            |
| <b>HIS1 CRIME/R</b>              | <b>GAGCTACAGGGCTTGACC</b>                                                                                            |
| <b>sgRNA/F HGC1</b>              | <b>GGTATCGATACCGATAATGAGTTTTAGAGCTAGAAATAGCAAGT<br/>TAAA</b>                                                         |
| <b>SNR52/R HGC1</b>              | <b>TCATTATCGGTATCGATACCCAAATTAAAAATAGTTTACGCAAGTC</b>                                                                |
| <b>HGC1 check<br/>up/F</b>       | <b>CTTACATTTTAGACGACCAACGG</b>                                                                                       |
| <b>HGC1 check<br/>int/R</b>      | <b>CACCCATTACTTTACTTGCAATCC</b>                                                                                      |
| <b>CdHIS1 Check<br/>Int/R</b>    | <b>GGCGCAACAGATATATTGGTGCTCG</b>                                                                                     |
| <b>SNR52/F</b>                   | <b>AAGAAAGAAAGAAAACCAGGAGTGAA</b>                                                                                    |
| <b>sgRNA/R</b>                   | <b>ACAAATATTTAAACTCGGGACCTGG</b>                                                                                     |
| <b>SNR52/N</b>                   | <b>GCGGCCGCAAGTGATTAGACT</b>                                                                                         |
| <b>sgRNA/N</b>                   | <b>GCAGCTCAGTGATTAAGAGTAAAGATGG</b>                                                                                  |
| <b>CaCas9/for</b>                | <b>ATCTCATTAGATTTGGAAGTTGTGGGTT</b>                                                                                  |
| <b>CaCas9/rev</b>                | <b>TTCGAGCGTCCCAAACCTTCT</b>                                                                                         |
| <b>pNAT F</b>                    | <b>TTTCCCAGTCACGACGTT</b>                                                                                            |
| <b>r1 check int/R</b>            | <b>CACTAAAGGGAACAAAAGCTGG</b>                                                                                        |
| <b>HGC1 cloning F1</b>           | <b>GGGCAAATCAAATTTTACACAAAAAG</b>                                                                                    |
| <b>HGC1 cloning R1</b>           | <b>CGAATAAAGGATACTTCCAGTAGTGTATT</b>                                                                                 |

|                         |                                                                                                                       |
|-------------------------|-----------------------------------------------------------------------------------------------------------------------|
| HGC13'R1-<br>pNAT5'R    | CGACGTCGGGCCCAATTCGCCCTATAGTGAGTCGTATTACAA<br>TTCCTGGCCGTCGTTTTACAACGTCGTGACTGGGAAACGAA<br>TAAA GGATACTTCCAGTAGTGTATT |
| pNAT3'R-<br>HGC1down R1 | TAATCTAATCGAAGGTAAAAAACAATCTTGAGTTGACCATAA<br>AGTAATTGCCATTGAGACCGAAGTAACAATTCAGGAGTGGAAT<br>TG TGAGCGGATA            |
| sgRNA/F r1              | GGGATCCACTAGTTCTAGAGGTTTTAGAGCTAGAAATAGCAAG<br>T TAAA                                                                 |
| SNR52/R r1              | CTCTAGAACTAGTGGATCCCCAAATTA AAAATAGTTTACGCAA<br>GT C                                                                  |
| NAT1 CHR                | GTTCTGTATCTATAAGCAGTATCATCCAAAGTAGT                                                                                   |
| CCN1OE F                | CGTTATTTTTTTTTGTCGTCCTTAATCATTAGTAGTAGTGAGA<br>GACATTTTTTTTTGGTGTGTGTA AAAAAAAAAATACGCGAATCAAG<br>CTTGCCCTCGTCCCC     |
| CCN1OE R                | TCAAGTATTGGATGGTATGGTCGACGTTTAATATGATGTGGA<br>GGACCATATTTGACTCTTTGTTGTTGTAAAGATGTCATCGTTG<br>GGAGCTCTCCCAATG          |
| CLN3OE F                | ACAATTATCTTTCACCCTAACATTCACTCATTTCATAGGTTTCC<br>AAATATTCAATCCGATTCCAGTTTGATACGTGTGAAATCAAGC<br>TTGCCTCGTCCCC          |
| CLN3OE R                | TGTA ACTTGAAATTACTTGCTTTGATCAGGGATTGCATCATCC<br>TAACTTGATGGAAAGCATCAGGTGAATTAGGAAACATCGTTG<br>GGAGCTCTCCCAATG         |
| CLB2OE F                | GTCAAGACTAAAAAAAAAACAACAAACCAAAGAATCACTA<br>AACAAAACATTTACTAAAAGGGAGAGAGAGAAAAGAATCA<br>AGCTTGCCCTCGTCCCC             |
| CLB2OE R                | CTTATCGACTCTTGATGCTGTACTTTTGATCTAGTAAGTCTAA<br>ACTCATTTTCATTATTAGTTTTAGTGACTTGTGGCATCGTTGG<br>GAGCTCTCCCAATG          |
| CLB4OE F                | TAATACACTGATCAAACGACAGTACTAAACTTACGAAAGCTTT<br>CAGTTTCTACCGTGCTTCACAGCTTGTTCTTTAGACATCAAG<br>CTTGCCCTCGTCCCC          |
| CLB4OE R                | AAATTGGCAATACTTTTGGCTCTAAGTCTTTGTTTTGTCAACT<br>CATTTTCATCCGTTATGGATGATTTATAAGATCGCATCGTTGG<br>GAGCTCTCCCAATG          |
| PCL1OE F                | CAAAATCTATTTTAATAACCAAAGACACGCCAAATTA CT TTTCT<br>TTCTCTGTCTCTGTCTCCTTTCTTTCTTTCTTTATCAAGC<br>TTGCCTCGTCCCC           |

|           |                                                                                                             |
|-----------|-------------------------------------------------------------------------------------------------------------|
| PCL1OE R  | ACAATCTTATGGATCATATCATGAGTGATTGGACCATTAAGAA<br>ATACTTTTAAAGCTTGTAATCAATTGAAGAAACCATCGTTGG<br>GAGCTCTCCAATG  |
| PCL2OE F  | TTTTGAAGCAAAGCCAACAAAGTAAAACAATCGAAATTTGCTA<br>TCGTCAACAAAGAAAACAAAAAAAAGGCTTATTGTGATCAA<br>GCTTGCCTCGTCCCC |
| PCL2OE R  | GTGGTTGCAACTAGAAAGTTGACCATATCTTGTGATACTGGCT<br>GTCTTGAGAATATTTTCAAAGCTTCTTTGTCTGACATCGTTGG<br>GAGCTCTCCAATG |
| PCL5OE F  | ATAGTATTATTTGGTGGCAAATGTCCTACTCCACAACTGGTT<br>TGTGATCTGTCCCGGTCAATGATGCAATCTCGTGTGAATCAAG<br>CTTGCCTCGTCCCC |
| PCL5OE R  | GTTTCTGTGGTGGTTGATTCCTTTGAAAAGGATGGTACACTTG<br>TTTCTTTATAGGAAATAGGAGAAGTTGGAGATTGCATCGTTGG<br>GAGCTCTCCAATG |
| PCL7OE F  | TTCCAACAAAGTTTTTTTTTATTTTTTACTTTTTTTTACTATTTT<br>TTGTTGTTGTTGATTGACTAATTGAATGTCTTCAAATCAAGCT<br>TGCTCGTCCCC |
| PCL7OE R  | TGGTCTATGACCAGACCCCTTCTCGATTGTTGGGTCTATAG<br>TGGTCGAGTTGGTGTACCGTTATACTGTGATGTCATCGTTGG<br>GAGCTCTCCAATG    |
| CLG1OE F  | CCTATTCTCATCAAATATCTAAACTGAAATCACATTTCTTTCT<br>TCCTTCCTCAAATTAACCTAATAAAGACTGTATATATCAAGC<br>TTGCCTCGTCCCC  |
| CLG1OE R  | TGTTTAAGAATTCCGTGGCAAGCCCATCCAATAAAGGAGGGC<br>ATGTCACTTATCTGGTACTCCTGATACTCCTTATCCATCGTTG<br>GGAGCTCTCCAATG |
| CCN1 CHF  | ACAAACCTTCACTTCTTCTTCTCCTCC                                                                                 |
| CCN1 CHR  | CACAAAGAAACCTAGCAACAGCAGTTA                                                                                 |
| CCN1 FCHF | GTTGTTGCTGTTGTTGTTGTTGTTGTC                                                                                 |
| CLN3 CHF  | TTTCTTCCATCAACACTAATCTGGTGC                                                                                 |
| CLN3 CHR  | GCATTGACGACCCATTCTAATGAT                                                                                    |
| CLN3 FCHF | TCATCACTACCAAAGAACCACCTGATC                                                                                 |
| CLB2 CHF  | AATAGGTGAGAGCAACCACAAGAAGAG                                                                                 |
| CLB2 CHR  | GATGTTACAGAGACTTGAGGTGGTGAT                                                                                 |
| CLB2 FCHF | CATCAATCACCACCACCACCAC                                                                                      |

|                        |                                                              |
|------------------------|--------------------------------------------------------------|
| <b>CLB4 CHF</b>        | <b>TAAGCAACCAAACGCTTCAAAGAGAG</b>                            |
| <b>CLB4 CHR</b>        | <b>GCTGTTTCTGTGATGATTGGTGTTTGT</b>                           |
| <b>CLB4 FCHF</b>       | <b>TAACAGTTTGCTTTACCTACCACGAG</b>                            |
| <b>PCL1 CHF</b>        | <b>TTCGAGTTCTCCAGAGTCTCC</b>                                 |
| <b>PCL1 CHR</b>        | <b>GAAATGGATACAGCAACGGCAG</b>                                |
| <b>PCL1 FCHF</b>       | <b>AATTAAAGAGAAACGCGACACC</b>                                |
| <b>PCL2 CHF</b>        | <b>GTGTGTTGGCGTTGTTGTTGTTG</b>                               |
| <b>PCL2 CHR</b>        | <b>GCTGGTTTCTCTTCAGTGGTTTGAC</b>                             |
| <b>PCL2 FCHF</b>       | <b>GTCGTGACTGTCGTTTGATTGTATAAGG</b>                          |
| <b>PCL5 CHF</b>        | <b>GTGGCAGCAGCAACAAATTGTG</b>                                |
| <b>PCL5 CHR</b>        | <b>GTTTCTGTGGTGGTTGATTCCTTGA</b>                             |
| <b>PCL5 FCHF</b>       | <b>TTTGCCAGGAAAGTAGGTGCTC</b>                                |
| <b>PCL7 CHF</b>        | <b>TGATACAAGAGACATTGCCAACATACA</b>                           |
| <b>PCL7 CHR</b>        | <b>GACGCTGGATAAGAGTGATGTGATG</b>                             |
| <b>PCL7 FCHF</b>       | <b>TGAACTCTAGTCAACCCACCAC</b>                                |
| <b>CLG1 CHF</b>        | <b>CCCTGTGGTACACGACCTATCC</b>                                |
| <b>CLG1 CHR</b>        | <b>GTGGCAAGCCCATCCAATAAAGG</b>                               |
| <b>CLG1 FCHF</b>       | <b>ATTAAACTCTATCCAGCCCACCATTG</b>                            |
| <b>sgRNA/F CCN1P-1</b> | <b>TTTCAAATTTTTTATATTGTTTTAGAGCTAGAAATAGCAAG<br/>TTAAA</b>   |
| <b>SNR52/R CCN1P-1</b> | <b>AATATAAAAAAATTTTGAAACAAATTA AAAATAGTTTACGCAA<br/>GTC</b>  |
| <b>sgRNA/F CLN3P-1</b> | <b>AAATTGAATATTTTAAAAGAGTTTTAGAGCTAGAAATAGCAAG<br/>TTAAA</b> |
| <b>SNR52/R CLN3P-1</b> | <b>TCTTTTAAAATATTCAATTTCAAATTA AAAATAGTTTACGCAA<br/>GTC</b>  |
| <b>sgRNA/F CLB2P-1</b> | <b>CTCATCGAACAAGATCTTACGTTTTAGAGCTAGAAATAGCAAG<br/>TTAAA</b> |

|                                  |                                                                                                                            |
|----------------------------------|----------------------------------------------------------------------------------------------------------------------------|
| <b>SNR52/R CLB2P-1</b>           | <b>GTAAGATCTTGTTTCGATGAGCAAATTA AAAATAGTTTACGCAA<br/>GTC</b>                                                               |
| <b>sgRNA/F CLB4P-1</b>           | <b>AAGAAAAAAGTTCTATATAGTTTTAGAGCTAGAAATAGCAAG<br/>TTAAA</b>                                                                |
| <b>SNR52/R CLB4P-1</b>           | <b>TATATAGA ACTTTTTTTCTTCAAATTA AAAATAGTTTACGCAA<br/>GTC</b>                                                               |
| <b>sgRNA/F PCL1P-1</b>           | <b>GAGA ACTCGAAATCAAAAAAGTTTTAGAGCTAGAAATAGCAA<br/>GTTAAA</b>                                                              |
| <b>SNR52/R PCL1P-1</b>           | <b>TTTTTTGATTTTCGAGTTCTCCAAATTA AAAATAGTTTACGCAA<br/>GTC</b>                                                               |
| <b>sgRNA/F PCL2P-1</b>           | <b>GTGATGTTTGTTGACATTGCGTTTTAGAGCTAGAAATAGCAAG<br/>TTAAA</b>                                                               |
| <b>SNR52/R PCL2P-1</b>           | <b>GCAATGTCAACAAACATCACCCAAATTA AAAATAGTTTACGCA<br/>AGTC</b>                                                               |
| <b>sgRNA/F PCL5P-1</b>           | <b>AGCAGTGACA ACTTATCTGCGTTTTAGAGCTAGAAATAGCAA<br/>GTTAAA</b>                                                              |
| <b>SNR52/R PCL5P-1</b>           | <b>GCAGATAAGTTGTC ACTGCTCAAATTA AAAATAGTTTACGCAA<br/>GTC</b>                                                               |
| <b>sgRNA/F PCL7P-1</b>           | <b>AAAAGAAAAGAAAGCACATTGTTTTAGAGCTAGAAATAGCAA<br/>GTTAAA</b>                                                               |
| <b>SNR52/R PCL7P-1</b>           | <b>AATGTGCTTTCTTTTCTTTCAAATTA AAAATAGTTTACGCAA<br/>GTC</b>                                                                 |
| <b>sgRNA/F CLG1P-1</b>           | <b>GCTGACTCAGTTTGTAAGACGTTTTAGAGCTAGAAATAGCAA<br/>GTTAAA</b>                                                               |
| <b>SNR52/R CLG1P-1</b>           | <b>GTCTTACAACTGAGTCAGCCAAATTA AAAATAGTTTACGCAA<br/>GTC</b>                                                                 |
| <b>NAT CRIME/F</b>               | <b>CAGACGCGTTGAATTGTCC</b>                                                                                                 |
| <b>NAT CRIME/R</b>               | <b>CACCATGACCTCTATGTTCTGG</b>                                                                                              |
| <b>CCN1 del<br/>rNATrBamHI/F</b> | <b>CAATTTCCATTTTTGCATATATTAATTACTATTACTCAGTCCAT<br/>TCGCTTTAAATCTATACATATATCCTAAATCTTATCGCTTTAAT<br/>GCGGTAGTTTATCACAG</b> |
| <b>CCN1 del<br/>rNATrXmaI/R</b>  | <b>TTTCTGATTTATATTAACGTCAACGTCAATATAAATTA AACAG<br/>GACAAAATGTATAGCTAGAAATAACACCATCATAACTGTGTGG<br/>TCGCCATGATCG</b>       |
| <b>sgRNA/F CCN1-3</b>            | <b>TAGTTGGTTGTACAGCATTAGTTTTAGAGCTAGAAATAGCAAG<br/>TTAAA</b>                                                               |

|                |                                                     |
|----------------|-----------------------------------------------------|
| SNR52/R CCN1-3 | TAATGCTGTACAACCAACTACAAATTA AAAATAGTTTACGCAA<br>GTC |
|----------------|-----------------------------------------------------|

**Supplementary Table S3: List of primers and their nucleotide sequence.**
